# Supplementary material
Source: MDPI journal article supplement (https://www.mdpi.com/2072-4292/7/12/15869)

**Supplementary Materials: A New Approach to the Generation of Orthoimages of Cultural Heritage Objects—Integrating TLS and Image Data**

Jakub Stefan Markiewicz, Piotr Podlasiak and Dorota Zawieska

**Appendix 1.** Results of searches for points—Variant I.

| **Wall No.** | **Image No.** | **Number of Detected Points** | **Number of Incorrectly Matched Points (Threshold 11 Pixels)** | **Percentage of Incorrectly Matched Points** |
| --- | --- | --- | --- | --- |
| 1 | 6469 | 2884 | 331 | 11.5 |
| 1 | 6471 | 2992 | 335 | 11.2 |
| 2 | 6097 | 3820 | 308 | 8.1 |
| 2 | 6098 | 3056 | 269 | 8.8 |
| 3 | 6203 | 2156 | 325 | 15.1 |
| 3 | 6204 | 1724 | 319 | 18.5 |
| 4 | 6318 | 677 | 75 | 11.1 |
| 4 | 6320 | 723 | 72 | 10.0 |
|  | Max. | 3820 | 335 | 18.5 |
|  | Min. | 677 | 72 | 8.1 |
|  | Avg. | 2254.0 | 254.3 | 11.8 |

**Appendix 2**

**Table 1.** Statistical characteristics of results of the process of orientation of an individual image—control points.

|  | | | | **Deviation (pix)** | | | | | | **Relative Accuracy (%)** | | | |
| --- | --- | --- | --- | --- | --- | --- | --- | --- | --- | --- | --- | --- | --- |
| **Threshold (pix)** | **Wall** | **Image No.** | **No. points** | **dX min** | **dX max** | **dY min** | **dY max** | **Mean dX** | **Mean dY** | **dX min** | **dX max** | **dY min** | **dY max** |
| 11 | 2 | 6097 | 3073 | 0.000 | 10.005 | 0.000 | 9.342 | 1.225 | 1.213 | 0.00001 | 0.16780 | 0.00000 | 0.15668 |
| 4.1 | 6097 | 3067 | 0.000 | 9.220 | 0.001 | 7.923 | 1.213 | 1.199 | 0.00000 | 0.15464 | 0.00002 | 0.13289 |
| 2.05 | 6097 | 3068 | 0.001 | 9.217 | 0.000 | 7.888 | 1.217 | 1.202 | 0.00002 | 0.15459 | 0.00001 | 0.13230 |
| 11 | 6098 | 2439 | 0.000 | 10.051 | 0.003 | 9.729 | 1.106 | 1.294 | 0.00000 | 0.16857 | 0.00005 | 0.16317 |
| 4.1 | 6098 | 2435 | 0.001 | 7.727 | 0.002 | 9.048 | 1.090 | 1.289 | 0.00001 | 0.12960 | 0.00003 | 0.15175 |
| 2.05 | 6098 | 2435 | 0.001 | 7.724 | 0.001 | 9.048 | 1.078 | 1.270 | 0.00002 | 0.12955 | 0.00001 | 0.15175 |
| 11 | 1 | 6469 | 2234 | 0.000 | 9.700 | 0.001 | 10.235 | 1.815 | 2.015 | 0.00001 | 0.16375 | 0.00002 | 0.17278 |
| 4.1 | 6469 | 2200 | 0.001 | 7.777 | 0.005 | 9.367 | 1.672 | 2.003 | 0.00002 | 0.13129 | 0.00008 | 0.15813 |
| 2.05 | 6469 | 2200 | 0.000 | 7.796 | 0.001 | 9.574 | 1.671 | 1.986 | 0.00001 | 0.13161 | 0.00002 | 0.16163 |
| 11 | 6471 | 2325 | 0.001 | 9.317 | 0.001 | 10.025 | 2.120 | 2.106 | 0.00002 | 0.15728 | 0.00001 | 0.16923 |
| 4.1 | 6471 | 2256 | 0.001 | 9.053 | 0.001 | 9.728 | 1.859 | 1.980 | 0.00002 | 0.15283 | 0.00002 | 0.16421 |
| 2.05 | 6471 | 2256 | 0.001 | 9.072 | 0.000 | 9.724 | 1.847 | 1.971 | 0.00002 | 0.15314 | 0.00000 | 0.16416 |
| 11 | 3 | 6203 | 1602 | 0.003 | 10.181 | 0.013 | 9.511 | 2.672 | 2.778 | 0.00005 | 0.17299 | 0.00021 | 0.16161 |
| 4.1 | 6203 | 1592 | 0.001 | 9.807 | 0.004 | 9.298 | 2.625 | 2.729 | 0.00001 | 0.16664 | 0.00007 | 0.15800 |
| 2.05 | 6203 | 1592 | 0.002 | 9.474 | 0.018 | 9.351 | 2.624 | 2.747 | 0.00003 | 0.16098 | 0.00030 | 0.15889 |
| 11 | 6204 | 1230 | 0.001 | 9.432 | 0.001 | 9.750 | 1.527 | 2.061 | 0.00002 | 0.16027 | 0.00002 | 0.16567 |
| 4.1 | 6204 | 1222 | 0.003 | 9.366 | 0.001 | 9.274 | 1.510 | 1.986 | 0.00005 | 0.15914 | 0.00002 | 0.15758 |
| 2.05 | 6204 | 1222 | 0.000 | 9.421 | 0.001 | 9.236 | 1.485 | 2.023 | 0.00001 | 0.16008 | 0.00002 | 0.15694 |
| 11 | 4 | 6318 | 529 | 0.001 | 10.571 | 0.002 | 8.978 | 1.755 | 2.307 | 0.00002 | 0.18020 | 0.00004 | 0.15304 |
| 4.1 | 6318 | 525 | 0.001 | 9.655 | 0.036 | 8.803 | 1.731 | 2.292 | 0.00001 | 0.16458 | 0.00061 | 0.15007 |
| 2.05 | 6318 | 525 | 0.013 | 9.683 | 0.001 | 8.871 | 1.700 | 2.258 | 0.00023 | 0.16506 | 0.00001 | 0.15122 |
| 11 | 6320 | 570 | 0.007 | 8.288 | 0.000 | 10.107 | 1.946 | 2.737 | 0.00012 | 0.14128 | 0.00000 | 0.17230 |
| 4.1 | 6320 | 525 | 0.002 | 6.981 | 0.005 | 8.326 | 1.524 | 2.042 | 0.00004 | 0.11901 | 0.00008 | 0.14193 |
| 2.05 | 6320 | 525 | 0.006 | 7.878 | 0.002 | 8.407 | 1.463 | 1.997 | 0.00010 | 0.13430 | 0.00003 | 0.14331 |
|  |  |  | max | 0.013 | 10.571 | 0.036 | 10.235 | 2.672 | 2.778 | 0.00023 | 0.18020 | 0.00061 | 0.17278 |
|  |  |  | min | 0.000 | 6.981 | 0.000 | 7.888 | 1.078 | 1.199 | 0.00000 | 0.11901 | 0.00000 | 0.13230 |
|  |  |  | avg | 0.002 | 9.058 | 0.004 | 9.231 | 1.686 | 1.979 | 0.00003 | 0.15330 | 0.00007 | 0.15622 |

**Table 2.** Statistical characteristics of results of the process of orientation of an individual image—check points.

|  |  |  |  | **Deviation (pix)** | | | | | | **Relative accuracy (%)** | | | |
| --- | --- | --- | --- | --- | --- | --- | --- | --- | --- | --- | --- | --- | --- |
| **Threshold (pix)** | **Wall** | **Image No.** | **No. Points** | **dX min** | **dX max** | **dY min** | **dY max** | **dL max** | **dLmin** | **dX min** | **dX max** | **dY min** | **dY max** |
| 11 | 2 | 6097 | 440 |  |  |  |  |  |  | 0.00000 | 0.00000 | 0.00000 | 0.00000 |
| 4.1 | 6097 | 438 | 0.003 | 6.160 | 0.008 | 7.923 | 8.187 | 0.243 | 0.00005 | 0.10331 | 0.00013 | 0.13289 |
| 2.05 | 6097 | 438 | 0.000 | 7.171 | 0.000 | 5.995 | 7.199 | 0.028 | 0.00001 | 0.12028 | 0.00001 | 0.10055 |
| 11 | 6098 | 350 | 0.001 | 7.742 | 0.007 | 7.077 | 7.799 | 0.031 | 0.00002 | 0.12985 | 0.00012 | 0.11869 |
| 4.1 | 6098 | 350 | 0.000 | 5.988 | 0.000 | 5.742 | 7.050 | 0.113 | 0.00001 | 0.10043 | 0.00000 | 0.09631 |
| 2.05 | 6098 | 350 | 0.008 | 4.966 | 0.002 | 7.215 | 7.472 | 0.056 | 0.00013 | 0.08328 | 0.00003 | 0.12102 |
| 11 | 1 | 6469 | 319 | 0.002 | 9.578 | 0.001 | 10.148 | 12.987 | 0.017 | 0.00004 | 0.16169 | 0.00002 | 0.17132 |
| 4.1 | 6469 | 316 | 0.006 | 6.948 | 0.011 | 9.548 | 9.875 | 0.134 | 0.00011 | 0.11730 | 0.00019 | 0.16119 |
| 2.05 | 6469 | 316 | 0.007 | 7.796 | 0.018 | 7.015 | 9.021 | 0.130 | 0.00012 | 0.13161 | 0.00030 | 0.11842 |
| 11 | 6471 | 334 | 0.015 | 7.987 | −0.006 | 9.919 | 12.575 | 0.207 | 0.00025 | 0.13482 | -0.00011 | 0.16745 |
| 4.1 | 6471 | 325 | 0.005 | 7.159 | 0.001 | 8.963 | 9.983 | 0.107 | 0.00009 | 0.12085 | 0.00001 | 0.15130 |
| 2.05 | 6471 | 325 | 0.003 | 6.680 | 0.000 | 7.580 | 9.596 | 0.056 | 0.00005 | 0.11277 | 0.00000 | 0.12797 |
| 11 | 3 | 6203 | 229 | 0.019 | 9.437 | 0.128 | 9.242 | 10.366 | 0.260 | 0.00005 | 0.11351 | 0.00000 | 0.12880 |
| 4.1 | 6203 | 227 | 0.029 | 8.822 | 0.058 | 8.454 | 8.971 | 0.287 | 0.00032 | 0.16035 | 0.00217 | 0.15704 |
| 2.05 | 6203 | 227 | 0.013 | 7.955 | −0.058 | 7.417 | 8.997 | 0.215 | 0.00049 | 0.14990 | 0.00098 | 0.14365 |
| 11 | 6024 | 177 | 0.039 | 8.871 | −0.013 | 6.655 | 11.090 | 0.292 | 0.00023 | 0.13516 | −0.00098 | 0.12603 |
| 4.1 | 6024 | 177 | 0.008 | 7.999 | 0.005 | 8.300 | 8.861 | 0.310 | 0.00066 | 0.15074 | −0.00022 | 0.11309 |
| 2.05 | 6024 | 174 | 0.009 | 9.325 | 0.010 | 8.384 | 9.401 | 0.191 | 0.00014 | 0.13591 | 0.00008 | 0.14103 |
| 11 | 4 | 6318 | 75 | 0.003 | 6.360 | 0.033 | 9.490 | 0.069 | 0.732 | 0.00005 | 0.10842 | 0.00057 | 0.16178 |
| 4.1 | 6318 | 75 | 0.007 | 6.216 | 0.125 | 7.840 | 8.229 | 0.975 | 0.00012 | 0.10596 | 0.00212 | 0.13364 |
| 2.05 | 6318 | 75 | 0.044 | 6.616 | 0.048 | 8.486 | 8.566 | 0.065 | 0.00076 | 0.11278 | 0.00082 | 0.14466 |
| 11 | 6320 | 83 | 0.069 | 5.739 | 0.044 | 9.917 | 10.461 | 0.115 | 0.00118 | 0.09783 | 0.00076 | 0.16904 |
| 4.1 | 6320 | 76 | 0.026 | 7.988 | 0.019 | 5.456 | 8.066 | 0.248 | 0.00045 | 0.13617 | 0.00032 | 0.09301 |
| 2.05 | 6320 | 76 | 0.021 | 5.773 | 0.144 | 7.690 | 9.616 | 0.523 | 0.00037 | 0.09842 | 0.00245 | 0.13108 |
|  |  |  | max | 0.069 | 9.578 | 0.144 | 10.148 | 12.987 | 0.975 | 0.00118 | 0.16169 | 0.00245 | 0.17132 |
|  |  |  | min | 0.000 | 4.966 | −0.058 | 5.456 | 0.069 | 0.017 | 0.00000 | 0.00000 | −0.00098 | 0.00000 |
|  |  |  | avg | 0.015 | 7.360 | 0.025 | 8.020 | 8.888 | 0.232 | 0.00024 | 0.11756 | 0.00041 | 0.12958 |

**Appendix 3.** Results of searches for points—Variant II.

| **Wall No.** | **Image No.** | **Number of Detected Points** | **Number of Incorrectly Matched Points (Threshold 11 pix)** | **Percentage of Incorrectly Matched Points** |
| --- | --- | --- | --- | --- |
| 1 | 6404 | 451 | 25 | 5.5 |
| 6397 | 660 | 69 | 10.5 |
| 6390 | 1063 | 261 | 24.6 |
| 6398 | 290 | 34 | 11.7 |
| 6378 | 1120 | 285 | 25.4 |
| 6089 | 750 | 61 | 8.1 |
| 6363 | 358 | 32 | 8.9 |
| 6361 | 1015 | 138 | 13.6 |
| 6379 | 675 | 191 | 28.3 |
| 2 | 5972 | 807 | 406 | 50.3 |
| 6009 | 1097 | 115 | 10.5 |
| 5994 | 477 | 24 | 5.0 |
| 6021 | 1274 | 302 | 23.7 |
| 6023 | 1008 | 485 | 48.1 |
| 6026 | 779 | 56 | 7.2 |
| 5999 | 247 | 25 | 10.1 |
| 5997 | 839 | 264 | 31.5 |
| 5991 | 897 | 120 | 13.4 |
| 3 | 6107 | 528 | 85 | 16.1 |
| 6113 | 654 | 163 | 24.9 |
| 6116 | 398 | 43 | 10.8 |
| 6208 | 1333 | 220 | 16.5 |
| 6126 | 702 | 145 | 20.7 |
| 6142 | 916 | 196 | 21.4 |
| 6145 | 714 | 280 | 39.2 |
| 6154 | 788 | 267 | 33.9 |
| 4 | 6294 | 222 | 29 | 13.1 |
| 6299 | 54 | 14 | 25.9 |
| 6312 | 467 | 21 | 4.5 |
| 6313 | 127 | 21 | 16.5 |
|  | max | 1333 | 485 | 50.3 |
|  | min | 54 | 14 | 4.5 |
|  | avg | 690.3 | 145.9 | 19.3 |

**Appendix 4**

**Table 1.** Statistical characteristics of results of the process of orientation of group images—control points.

| **Wall** | **Image No.** | **No. Points** | **Deviation (pix)** | | | | | | | | | **Relative Accuracy (%)** | | | |
| --- | --- | --- | --- | --- | --- | --- | --- | --- | --- | --- | --- | --- | --- | --- | --- |
| **dX min** | **dX max** | **dY min** | **dY max** | **Mean dX** | **Mean dY** | **Std dev X** | **Std dev Y** | **Std L** | **dX min** | **dX max** | **dY min** | **dY max** |
| 1 | 6404 | 372 | 0.01 | 8.32 | 0.01 | 9.05 | 1.61 | 1.75 | 2.16 | 2.42 | 3.25 | 0.00013 | 0.08326 | 0.00006 | 0.09054 |
| 6397 | 519 | 0.00 | 7.72 | 0.00 | 9.36 | 1.58 | 1.69 | 2.14 | 2.30 | 3.14 | 0.00001 | 0.07723 | 0.00002 | 0.09359 |
| 6390 | 703 | 0.00 | 9.39 | 0.00 | 9.58 | 2.25 | 2.20 | 2.92 | 2.83 | 4.07 | 0.00000 | 0.09390 | 0.00001 | 0.09582 |
| 6398 | 604 | 0.00 | 9.82 | 0.02 | 9.56 | 1.85 | 1.73 | 2.40 | 2.41 | 3.40 | 0.00002 | 0.09826 | 0.00021 | 0.09561 |
| 6378 | 731 | 0.00 | 9.56 | 0.00 | 9.33 | 2.42 | 2.04 | 3.08 | 2.77 | 4.14 | 0.00001 | 0.09567 | 0.00003 | 0.09330 |
| 6098 | 225 | 0.01 | 8.14 | 0.01 | 7.98 | 1.64 | 1.80 | 2.21 | 2.49 | 3.33 | 0.00013 | 0.08147 | 0.00008 | 0.07985 |
| 6363 | 286 | 0.01 | 8.11 | 0.02 | 8.45 | 1.74 | 1.99 | 2.33 | 2.64 | 3.52 | 0.00010 | 0.08117 | 0.00017 | 0.08457 |
| 6361 | 768 | 0.01 | 9.84 | 0.00 | 9.60 | 1.96 | 2.13 | 2.47 | 2.78 | 3.72 | 0.00011 | 0.09838 | 0.00002 | 0.09603 |
| 6379 | 424 | 0.00 | 9.43 | 0.01 | 9.27 | 2.20 | 2.04 | 2.82 | 2.68 | 3.89 | 0.00000 | 0.09438 | 0.00009 | 0.09275 |
| 2 | 5972 | 345 | 0.00 | 8.83 | 0.00 | 9.16 | 1.50 | 1.60 | 2.09 | 2.35 | 3.14 | 0.00000 | 0.08581 | 0.00000 | 0.08896 |
| 6009 | 859 | 0.00 | 9.58 | 0.00 | 9.87 | 2.27 | 2.22 | 2.96 | 2.90 | 4.15 | 0.00004 | 0.09302 | 0.00002 | 0.09587 |
| 5994 | 397 | 0.00 | 10.82 | 0.01 | 10.00 | 1.72 | 1.95 | 2.34 | 2.81 | 3.66 | 0.00000 | 0.10508 | 0.00010 | 0.09715 |
| 6021 | 851 | 0.00 | 9.75 | 0.00 | 9.77 | 2.17 | 2.05 | 2.83 | 2.68 | 3.90 | 0.00001 | 0.09470 | 0.00001 | 0.09490 |
| 6023 | 721 | 0.00 | 9.59 | 0.01 | 9.45 | 1.91 | 2.07 | 2.44 | 2.65 | 3.60 | 0.00000 | 0.09320 | 0.00005 | 0.09181 |
| 6026 | 634 | 0.01 | 9.87 | 0.00 | 9.16 | 1.39 | 1.63 | 2.00 | 2.27 | 3.02 | 0.00005 | 0.09583 | 0.00001 | 0.08898 |
| 5999 | 196 | 0.04 | 8.04 | 0.00 | 10.12 | 1.66 | 1.92 | 2.21 | 2.74 | 3.52 | 0.00039 | 0.07810 | 0.00001 | 0.09827 |
| 5997 | 505 | 0.00 | 8.31 | 0.00 | 10.02 | 1.46 | 1.69 | 1.89 | 2.38 | 3.04 | 0.00003 | 0.08075 | 0.00001 | 0.09736 |
| 5991 | 681 | 0.00 | 9.15 | 0.00 | 8.96 | 1.78 | 1.82 | 2.41 | 2.43 | 3.42 | 0.00000 | 0.08887 | 0.00001 | 0.08699 |
| 3 | 6107 | 388 | 0.00 | 10.93 | 0.00 | 10.64 | 1.67 | 1.83 | 2.48 | 2.56 | 3.56 | 0.00001 | 0.10727 | 0.00004 | 0.10437 |
| 6113 | 431 | 0.00 | 9.96 | 0.00 | 9.28 | 1.64 | 1.96 | 2.32 | 2.68 | 3.54 | 0.00003 | 0.09744 | 0.00002 | 0.09075 |
| 6116 | 311 | 0.01 | 8.67 | 0.00 | 9.51 | 1.67 | 2.01 | 2.39 | 2.77 | 3.65 | 0.00007 | 0.08483 | 0.00005 | 0.09300 |
| 6208 | 974 | 0.00 | 5.09 | 0.02 | 4.46 | 2.70 | 3.00 | 3.73 | 4.74 | 5.03 | 0.00000 | 0.08652 | 0.00028 | 0.07575 |
| 6126 | 487 | 0.00 | 9.99 | 0.03 | 10.08 | 1.56 | 2.01 | 2.24 | 2.77 | 3.57 | 0.00001 | 0.09767 | 0.00025 | 0.09856 |
| 6142 | 630 | 0.00 | 10.03 | 0.01 | 8.88 | 1.62 | 1.89 | 2.32 | 2.64 | 3.52 | 0.00001 | 0.09809 | 0.00005 | 0.08682 |
| 6145 | 414 | 0.00 | 10.09 | 0.00 | 10.09 | 1.62 | 1.96 | 2.24 | 2.80 | 3.59 | 0.00001 | 0.09862 | 0.00002 | 0.09864 |
| 6154 | 380 | 0.00 | 8.54 | 0.00 | 9.53 | 1.77 | 1.85 | 2.41 | 2.57 | 3.52 | 0.00002 | 0.08355 | 0.00005 | 0.09318 |
| 4 | 6294 | 170 | 0.10 | 8.61 | 0.00 | 9.18 | 2.44 | 2.01 | 3.05 | 2.83 | 4.16 | 0.00167 | 0.14623 | 0.00001 | 0.15589 |
| 6299 | 35 | 0.14 | 10.24 | 0.17 | 9.08 | 2.88 | 2.74 | 3.81 | 3.49 | 5.16 | 0.00231 | 0.17392 | 0.00284 | 0.15434 |
| 6312 | 392 | 0.01 | 8.44 | 0.00 | 9.32 | 1.61 | 1.70 | 2.13 | 2.44 | 3.24 | 0.00022 | 0.14344 | 0.00000 | 0.15841 |
| 6313 | 94 | 0.00 | 9.94 | 0.00 | 9.78 | 2.10 | 2.22 | 2.80 | 3.08 | 4.16 | 0.00003 | 0.16883 | 0.00003 | 0.16622 |
|  |  | max | 0.14 | 10.93 | 0.17 | 10.64 | 2.88 | 3.00 | 3.81 | 4.74 | 5.16 | 0.00231 | 0.17392 | 0.00284 | 0.16622 |
|  |  | min | 0.00 | 5.09 | 0.00 | 4.46 | 1.39 | 1.60 | 1.89 | 2.27 | 3.02 | 0.00000 | 0.07723 | 0.00000 | 0.07575 |
|  |  | avg | 0.01 | 9.16 | 0.01 | 9.28 | 1.88 | 1.98 | 2.52 | 2.73 | 3.69 | 0.00018134 | 0.100183 | 0.000151955 | 0.101276 |

**Table 2.** Statistical characteristics of results of the process of orientation of group images—check points.

| **Wall** | **Image No.** | **No. Points** | **Deviation (pix)** | | | | | | **Relative Accuracy (%)** | | | | | |
| --- | --- | --- | --- | --- | --- | --- | --- | --- | --- | --- | --- | --- | --- | --- |
| **dX min** | **dX max** | **dY min** | **dY max** | **dL max** | **dLmin** | **dX min** | **dX max** | **dY min** | **dY max** | **dL max** | **dLmin** |
| 1 | 6404 | 54 | 0.02 | 7.65 | 0.03 | 6.82 | 0.14 | 8.77 | 0.00018 | 0.07657 | 0.00032 | 0.06822 | 0.00135 | 0.08773 |
| 6397 | 74 | 0.00 | 6.03 | 0.11 | 5.68 | 0.26 | 7.41 | 0.00002 | 0.06027 | 0.00112 | 0.05679 | 0.00258 | 0.07410 |
| 6097 | 101 | 0.05 | 7.83 | 0.01 | 9.22 | 0.11 | 10.03 | 0.00055 | 0.07830 | 0.00012 | 0.09221 | 0.00107 | 0.10036 |
| 6398 | 87 | 0.01 | 9.61 | 0.03 | 8.60 | 0.20 | 9.71 | 0.00006 | 0.09612 | 0.00034 | 0.08600 | 0.00197 | 0.09710 |
| 6098 | 106 | 0.02 | 8.16 | 0.00 | 7.60 | 0.31 | 9.78 | 0.00021 | 0.08162 | 0.00000 | 0.07602 | 0.00309 | 0.09780 |
| 6098 | 33 | 0.08 | 8.14 | 0.14 | 5.40 | 0.25 | 8.86 | 0.00077 | 0.08147 | 0.00138 | 0.05400 | 0.00251 | 0.08864 |
| 6363 | 42 | 0.07 | 5.18 | 0.11 | 5.64 | 0.74 | 5.69 | 0.00073 | 0.05187 | 0.00109 | 0.05642 | 0.00735 | 0.05691 |
| 6361 | 111 | 0.01 | 8.92 | 0.00 | 8.93 | 0.20 | 9.14 | 0.00011 | 0.08919 | 0.00005 | 0.08930 | 0.00199 | 0.09146 |
| 6379 | 62 | 0.04 | 8.20 | 0.02 | 7.19 | 0.77 | 8.24 | 0.00040 | 0.08203 | 0.00019 | 0.07196 | 0.00774 | 0.08238 |
| 2 | 5972 | 51 | 0.00 | 7.38 | 0.01 | 8.13 | 0.53 | 8.15 | 0.00001 | 0.07165 | 0.00007 | 0.07895 | 0.00515 | 0.07914 |
| 6009 | 125 | 0.05 | 9.54 | 0.06 | 6.48 | 0.44 | 9.90 | 0.00045 | 0.09264 | 0.00054 | 0.06295 | 0.00431 | 0.09619 |
| 5994 | 58 | 0.01 | 10.37 | 0.04 | 6.38 | 0.30 | 10.77 | 0.00013 | 0.10073 | 0.00042 | 0.06197 | 0.00289 | 0.10457 |
| 6021 | 123 | 0.01 | 9.67 | 0.02 | 7.47 | 0.20 | 11.69 | 0.00014 | 0.09398 | 0.00016 | 0.07254 | 0.00198 | 0.11358 |
| 6023 | 104 | 0.00 | 7.12 | 0.04 | 8.93 | 0.21 | 8.95 | 0.00000 | 0.06917 | 0.00037 | 0.08673 | 0.00202 | 0.08694 |
| 6206 | 91 | 0.01 | 6.95 | 0.02 | 6.79 | 0.28 | 7.02 | 0.00014 | 0.06750 | 0.00016 | 0.06594 | 0.00272 | 0.06822 |
| 5999 | 28 | 0.01 | 5.70 | 0.01 | 7.08 | 0.58 | 7.14 | 0.00007 | 0.05535 | 0.00011 | 0.06877 | 0.00568 | 0.06937 |
| 5997 | 72 | 0.01 | 7.34 | 0.05 | 7.97 | 0.35 | 8.12 | 0.00006 | 0.07125 | 0.00050 | 0.07740 | 0.00345 | 0.07890 |
| 5991 | 98 | 0.01 | 6.35 | 0.02 | 5.37 | 0.22 | 6.94 | 0.00006 | 0.06170 | 0.00018 | 0.05218 | 0.00214 | 0.06740 |
| 3 | 6107 | 57 | 0.06 | 9.73 | 0.26 | 7.27 | 0.34 | 10.69 | 0.00060 | 0.09548 | 0.00252 | 0.07128 | 0.00332 | 0.10483 |
| 6113 | 62 | 0.03 | 7.32 | 0.10 | 9.89 | 0.14 | 11.90 | 0.00028 | 0.07159 | 0.00096 | 0.09673 | 0.00136 | 0.11636 |
| 6116 | 46 | 0.02 | 9.11 | 0.03 | 7.06 | 0.41 | 10.49 | 0.00021 | 0.08913 | 0.00034 | 0.06908 | 0.00405 | 0.10261 |
| 6208 | 141 | 0.09 | 7.58 | 0.00 | 8.21 | 0.36 | 14.65 | 0.00146 | 0.12887 | 0.00008 | 0.13946 | 0.00617 | 0.24890 |
| 6126 | 72 | 0.04 | 8.58 | 0.11 | 10.07 | 0.42 | 10.18 | 0.00039 | 0.08386 | 0.00104 | 0.09851 | 0.00410 | 0.09956 |
| 6142 | 92 | 0.10 | 7.28 | 0.01 | 6.20 | 0.28 | 7.78 | 0.00096 | 0.07123 | 0.00010 | 0.06060 | 0.00277 | 0.07612 |
| 6145 | 60 | 0.00 | 10.07 | 0.06 | 9.77 | 0.11 | 11.11 | 0.00001 | 0.09850 | 0.00054 | 0.09558 | 0.00109 | 0.10869 |
| 6154 | 56 | 0.13 | 9.41 | 0.05 | 9.76 | 0.34 | 11.04 | 0.00131 | 0.09204 | 0.00050 | 0.09546 | 0.00336 | 0.10797 |
| 4 | 6294 | 25 | 0.27 | 6.24 | 0.10 | 5.95 | 0.90 | 8.62 | 0.00451 | 0.10596 | 0.00164 | 0.10108 | 0.01531 | 0.14644 |
| 6299 | 7 | 0.38 | 8.05 | 0.22 | 8.13 | 4.08 | 10.80 | 0.00651 | 0.13675 | 0.00376 | 0.13807 | 0.06934 | 0.18348 |
| 6312 | 56 | 0.02 | 8.52 | 0.08 | 8.22 | 0.23 | 11.84 | 0.00027 | 0.14472 | 0.00129 | 0.13973 | 0.00386 | 0.20116 |
| 6313 | 14 | 0.29 | 3.46 | 0.07 | 6.93 | 0.66 | 7.13 | 0.00493 | 0.05878 | 0.00123 | 0.11780 | 0.01125 | 0.12118 |
|  |  | max | 0.38 | 10.37 | 0.26 | 10.07 | 4.08 | 14.65 | 0.00651 | 0.14472 | 0.00376 | 0.13973 | 0.06934 | 0.24890 |
|  |  | min | 0.00 | 3.46 | 0.00 | 5.37 | 0.11 | 5.69 | 0.00000 | 0.05187 | 0.00000 | 0.05218 | 0.00107 | 0.05691 |
|  |  | avg | 0.06 | 7.85 | 0.06 | 7.57 | 0.48 | 9.42 | 0.00085 | 0.08528 | 0.00070 | 0.08339 | 0.00620 | 0.10527 |

**Appendix 5 Wall 1**


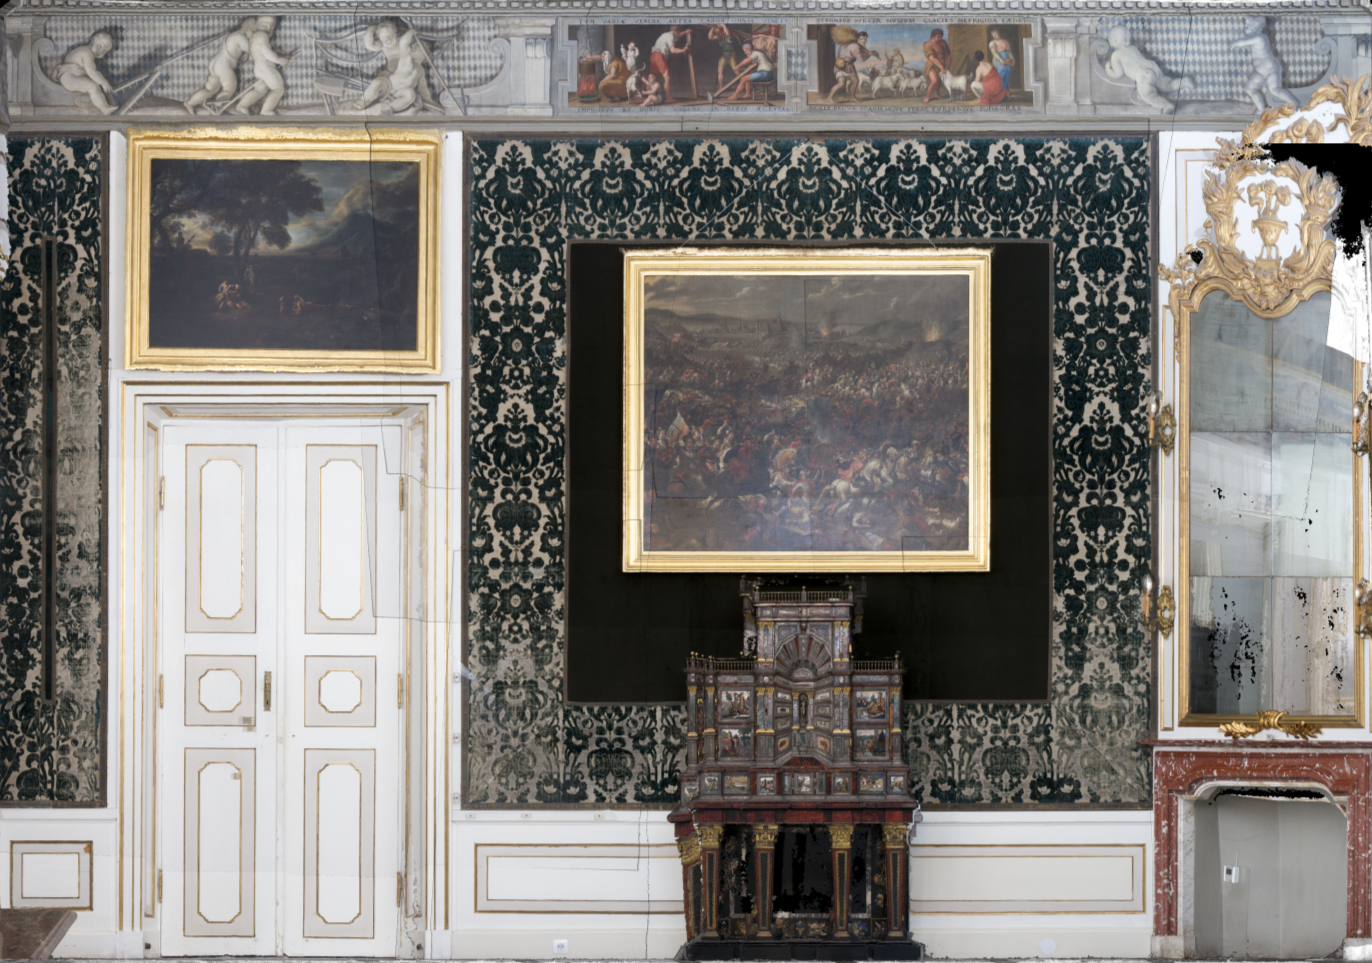


**Appendix 5 Wall 2**


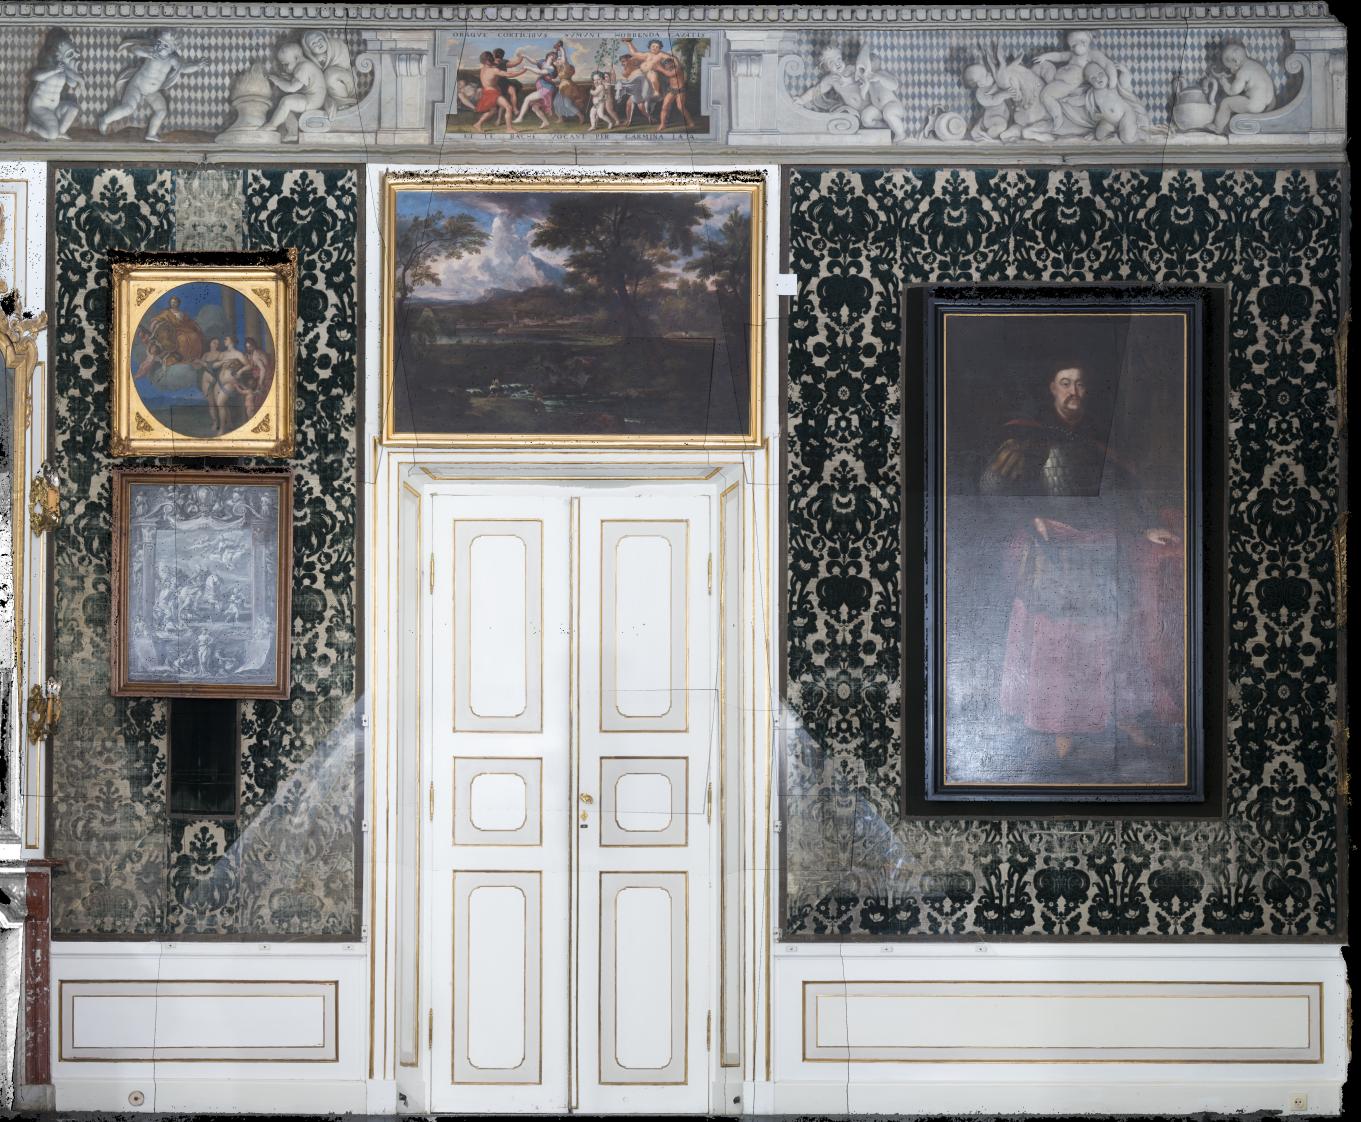


**Appendix 5 Wall 3**


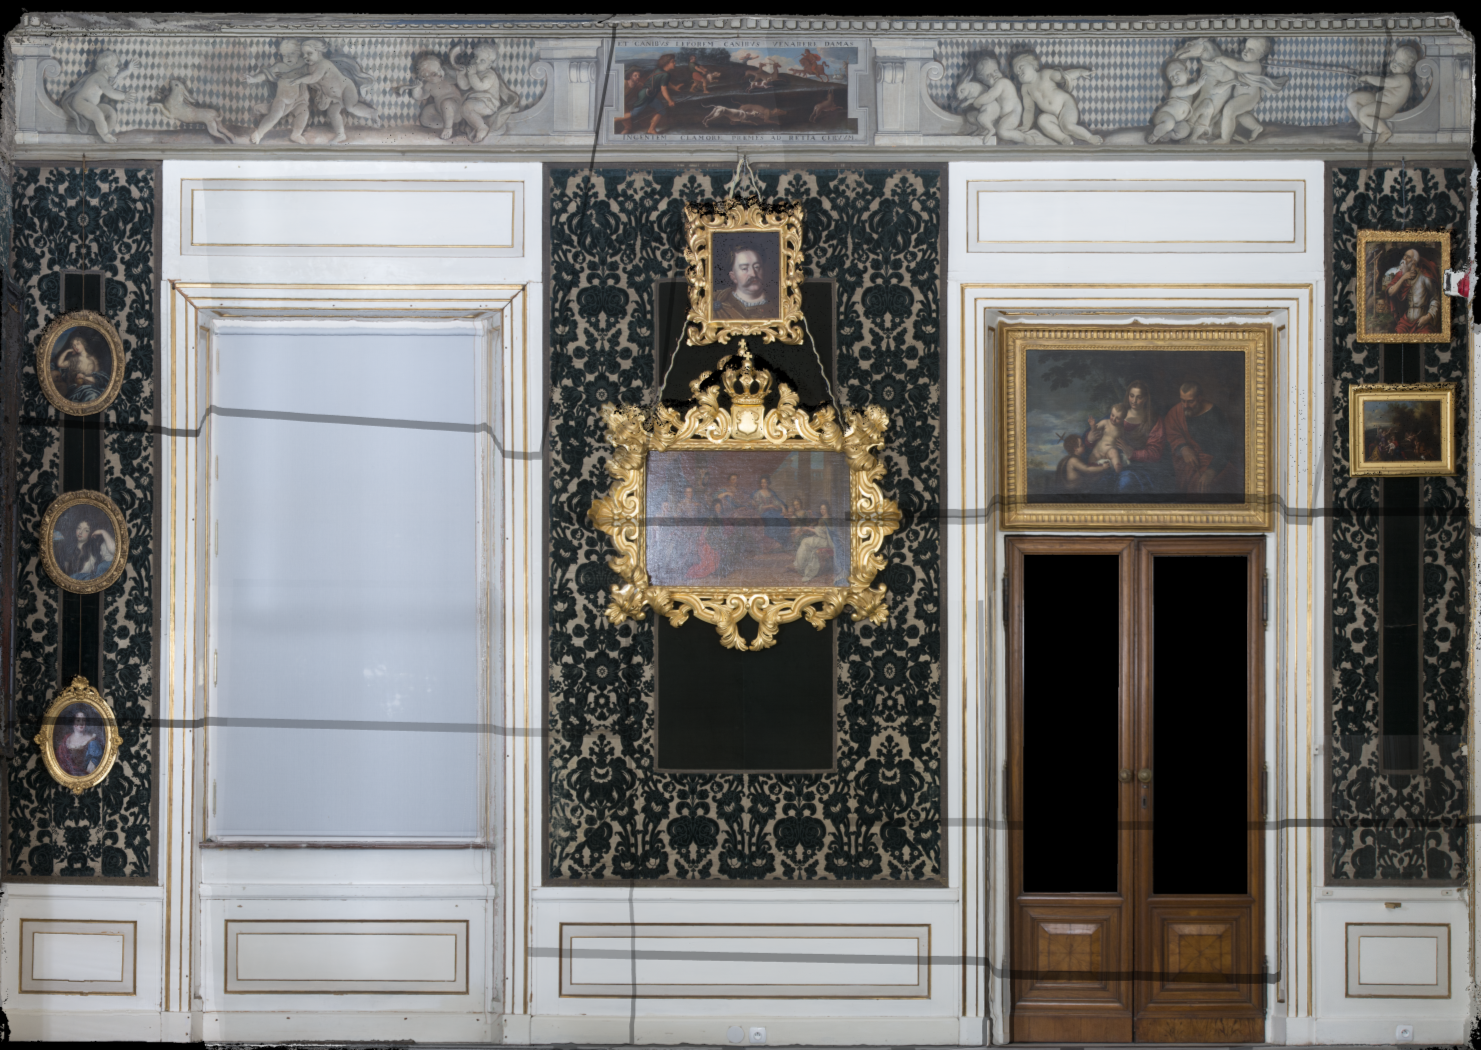


**Appendix 5 Wall 4**


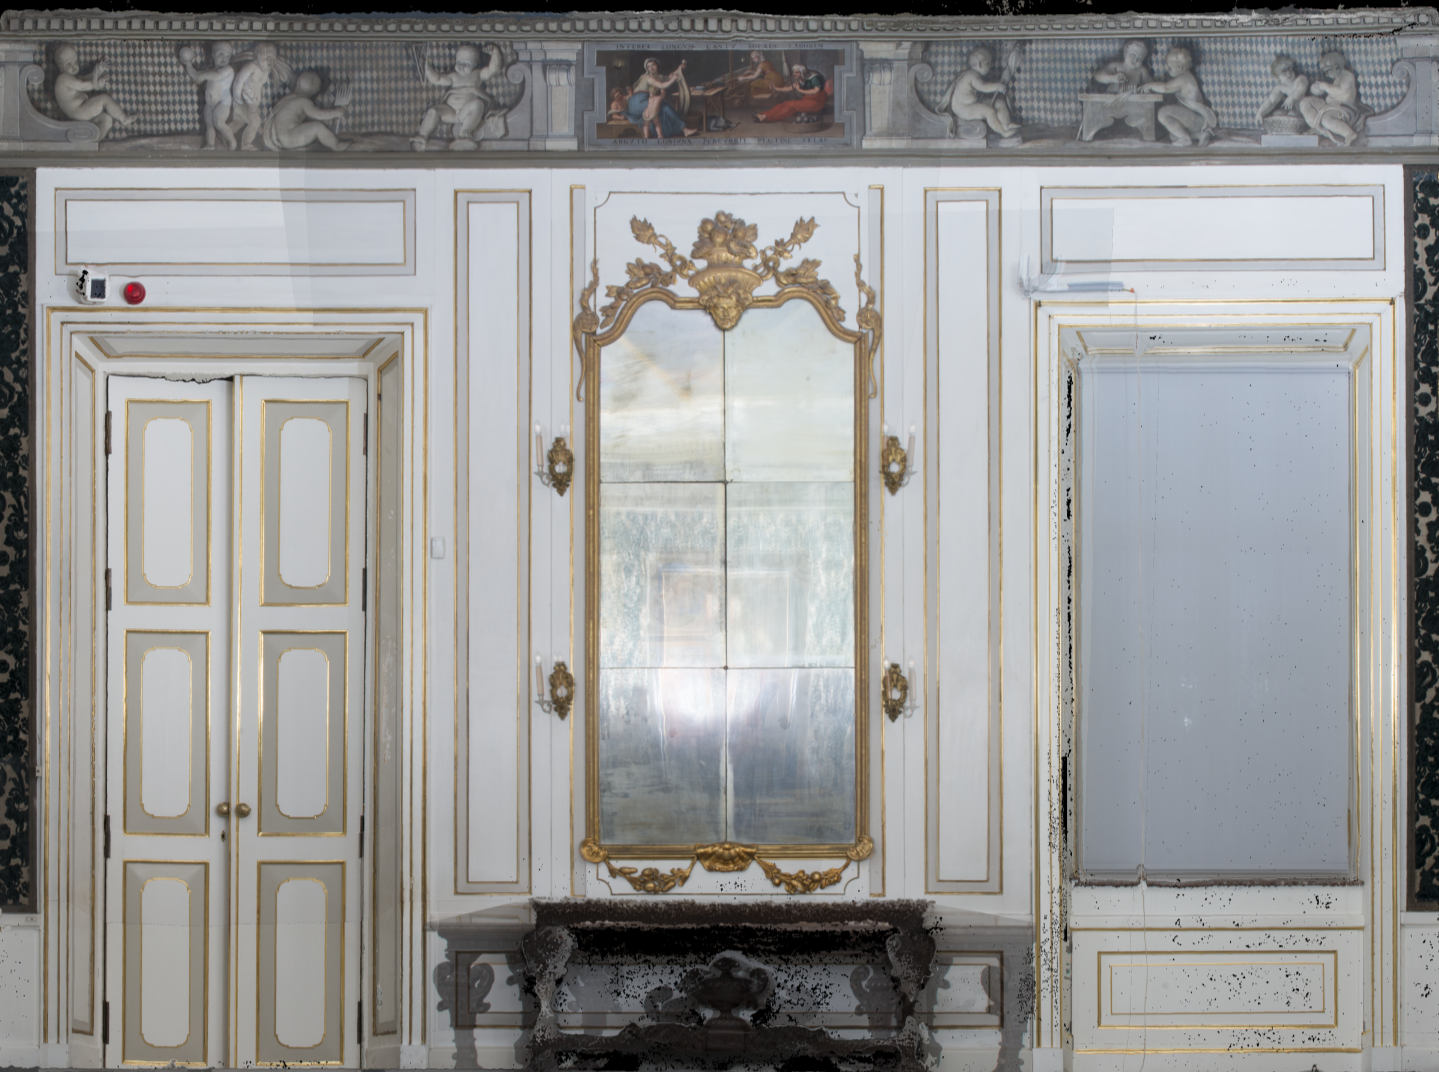

Supplement: s1 [file s1]
